# Supplementary material
Source: PubMed Central journal article supplement (PMC58814)

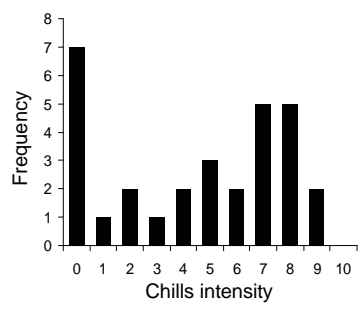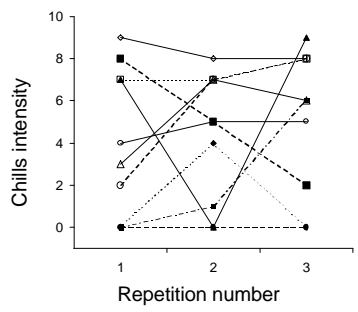

Supplement: pnas_98_20_11818__6.pdf [file pnas_98_20_11818__6.pdf]

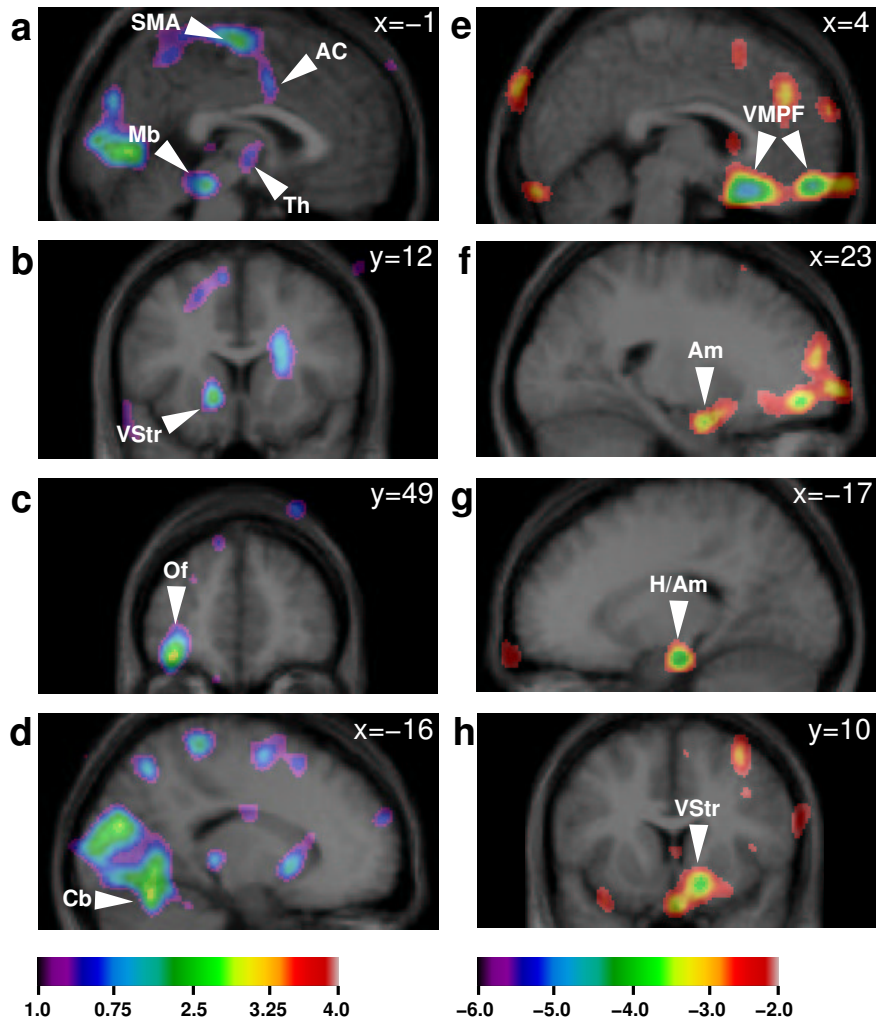

Supplement: pnas_98_20_11818__7.pdf [file pnas_98_20_11818__7.pdf]

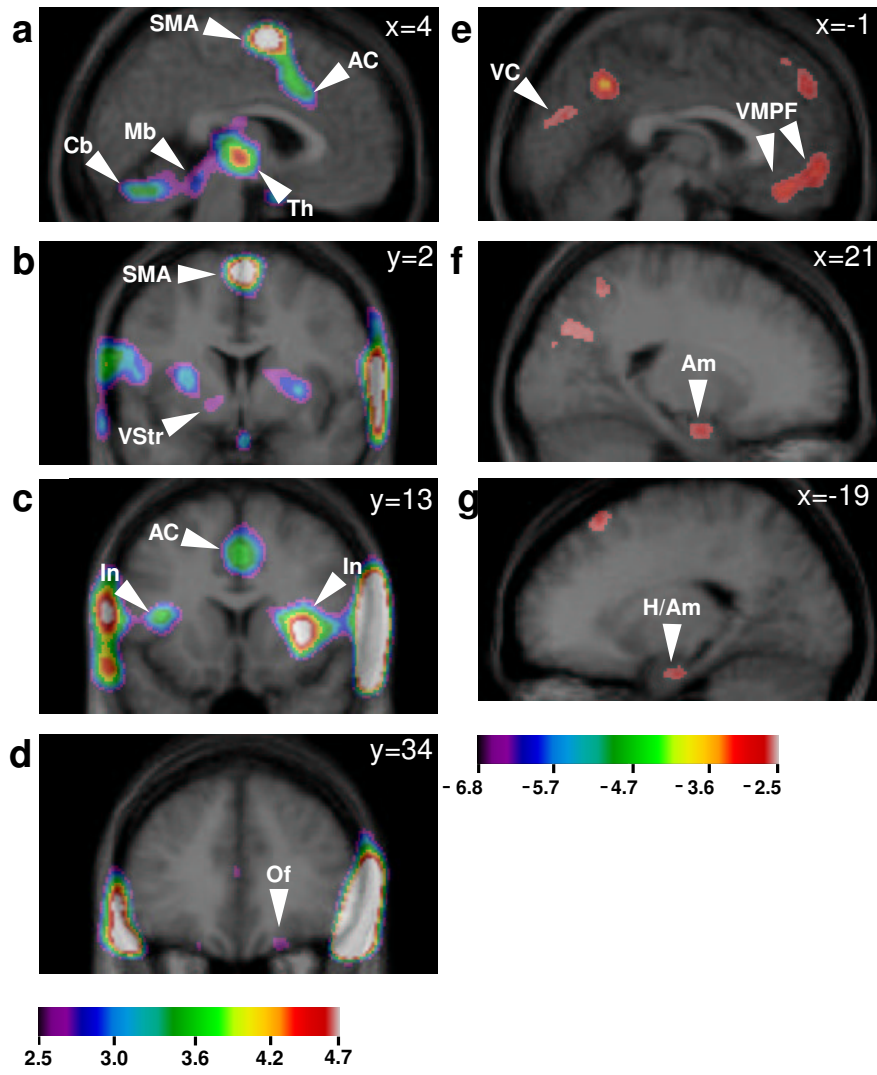

Supplement: pnas_98_20_11818__8.pdf [file pnas_98_20_11818__8.pdf]
